# Supplementary material
Source: PubMed Central journal article supplement (PMC2531068)
Supplement: NIHMS62617-supplement-1si20070601_02.pdf [file NIHMS62617-supplement-1si20070601_02.pdf]

## SUPPORTING INFORMATION

### **Triple-Helical Transition State Analogs: A New Class of Selective Matrix Metalloproteinase Inhibitors**

Janelle Lauer-Fields,<sup>1,2</sup> Keith Brew,<sup>2</sup> John K. Whitehead,<sup>3</sup> Shunzi Li,<sup>3</sup> Robert P. Hammer,<sup>3</sup> and Gregg B. Fields<sup>1,\*</sup>

<sup>1</sup>Department of Chemistry & Biochemistry and <sup>2</sup>College of Biomedical Sciences, Florida Atlantic University, Boca Raton, FL, 33431 and <sup>3</sup>Department of Chemistry, Louisiana State University, Baton Rouge, LA 70803

\*Corresponding author: Department of Chemistry & Biochemistry, Florida Atlantic University, 777 Glades Road, 301A Physical Sciences Building, Boca Raton, FL 33431. Phone 561-297-2093, Fax 561-297-2759, e-mail [fieldsg@fau.edu](mailto:fieldsg@fau.edu)

## SUPPORTING INFORMATION FIGURE LEGENDS

**Figure S1.**  $^1\text{H}$  NMR spectrum (250 Hz,  $\text{CD}_3\text{SOCD}_3$ ) of (*R,S*)-2-isopropyl-3-((1-(*N*-(9-fluorenylmethoxycarbonyl)amino)-methyl)-adamantyloxyphosphinyl) propanoic acid (**1**).

**Figure S2.**  $^{13}\text{C}$  NMR spectrum (75 Hz,  $\text{CD}_3\text{SOCD}_3$ ) of (*R,S*)-2-isopropyl-3-((1-(*N*-(9-fluorenylmethoxycarbonyl)amino)-methyl)-adamantyloxyphosphinyl) propanoic acid (**1**).

**Figure S3.**  $^{31}\text{P}$  NMR spectrum (101 Hz,  $\text{CD}_3\text{SOCD}_3$ ) of (*R,S*)-2-isopropyl-3-((1-(*N*-(9-fluorenylmethoxycarbonyl)amino)-methyl)-adamantyloxyphosphinyl) propanoic acid (**1**).

**Figure S4.**  $^1\text{H}$  NMR spectrum (250 Hz,  $\text{CDCl}_3$ ) of 2-isopropyl-3-oxobutyric acid allyl ester (**2**).

**Figure S5.**  $^{13}\text{C}$  NMR spectrum (63 Hz,  $\text{CDCl}_3$ ) of 2-isopropyl-3-oxobutyric acid allyl ester (**2**).

**Figure S6.**  $^1\text{H}$  NMR spectrum (250 Hz,  $\text{CDCl}_3$ ) of 2-isopropylacrylic acid allyl ester (**6**).

**Figure S7.**  $^{13}\text{C}$  NMR spectrum (75 Hz,  $\text{CDCl}_3$ ) of 2-isopropylacrylic acid allyl ester (**6**).

**Figure S8.**  $^1\text{H}$  NMR spectrum (300 Hz,  $\text{CD}_3\text{SOCD}_3$ ) of (*R,S*)-2-isopropyl-3-((1-(*N*-(9-fluorenylmethoxycarbonyl)amino)-methyl)-phosphinic acid) propanoic acid allyl ester (**7**).

**Figure S9.**  $^{13}\text{C}$  NMR spectrum (75 Hz,  $\text{CD}_3\text{SOCD}_3$ ) of (*R,S*)-2-isopropyl-3-((1-(*N*-(9-fluorenylmethoxycarbonyl)amino)-methyl)-phosphinic acid) propanoic acid allyl ester (**7**).

**Figure S10.**  $^{31}\text{P}$  NMR spectrum (101 Hz,  $\text{CD}_3\text{SOCD}_3$ ) of (*R,S*)-2-isopropyl-3-((1-(*N*-(9-fluorenylmethoxycarbonyl)amino)-methyl)-phosphinic acid) propanoic acid allyl ester (**7**).

**Figure S11.**  $^1\text{H}$  NMR spectrum (250 Hz,  $\text{CDCl}_3$ ) of (*R,S*)-2-isopropyl-3-((1-(*N*-(9-fluorenylmethoxycarbonyl)amino)-methyl)-adamantyloxyphosphinyl) propanoic acid, allyl ester (**8**).

**Figure S12.**  $^{13}\text{C}$  NMR spectrum (63 Hz,  $\text{CDCl}_3$ ) of (*R,S*)-2-isopropyl-3-((1-(*N*-(9-fluorenylmethoxycarbonyl)amino)-methyl)-adamantylxyphosphinyl) propanoic acid, allyl ester (**8**).

**Figure S13.**  $^{31}\text{P}$  NMR spectrum (101 Hz,  $\text{CDCl}_3$ ) of (*R,S*)-2-isopropyl-3-((1-(*N*-(9-fluorenylmethoxycarbonyl)amino)-methyl)-adamantylxyphosphinyl) propanoic acid, allyl ester (**8**).

Complete reference 26: Reiter, L. A.; Rizzi, J. P.; Pandit, J.; Lasut, M. J.; McGahee, S. M.; Parikh, V. D.; Blake, J. F.; Danley, D. E.; Laird, E. R.; Lopez-Anaya, A.; Lopresti-Morrow, L. L.; Mansour, M. N.; Martinelli, G. J.; Mitchell, P. G.; Owens, B. S.; Pauly, T. A.; Reeves, L. M.; Schulte, G. K.; Yocum, S. A. *Bioorg. Med. Chem. Lett.* **1999**, *9*, 127-132.

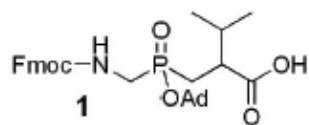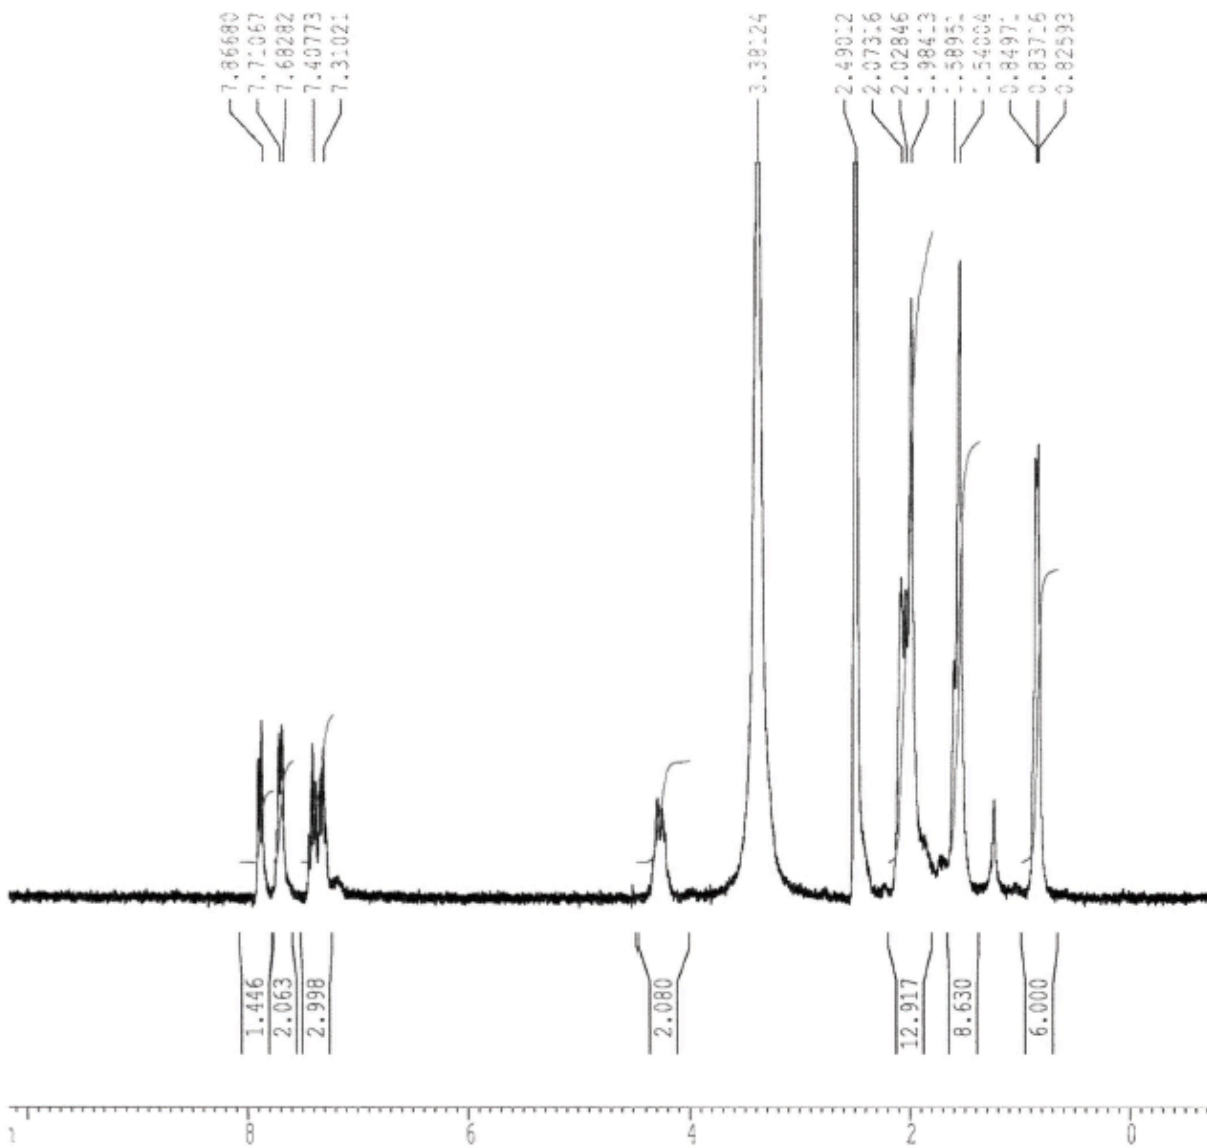

Figure S1

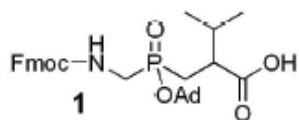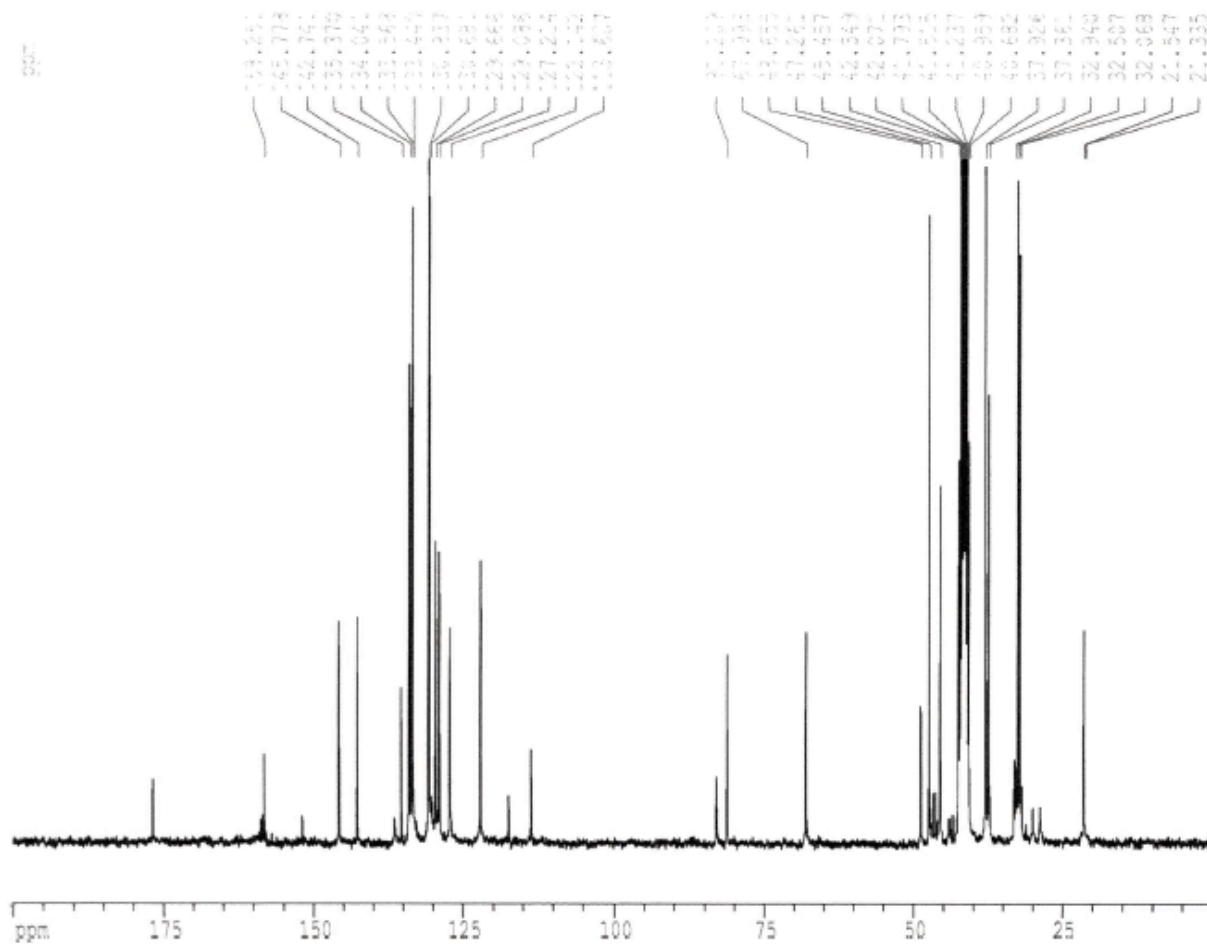

Figure S2

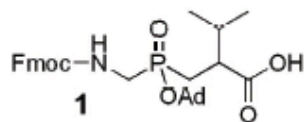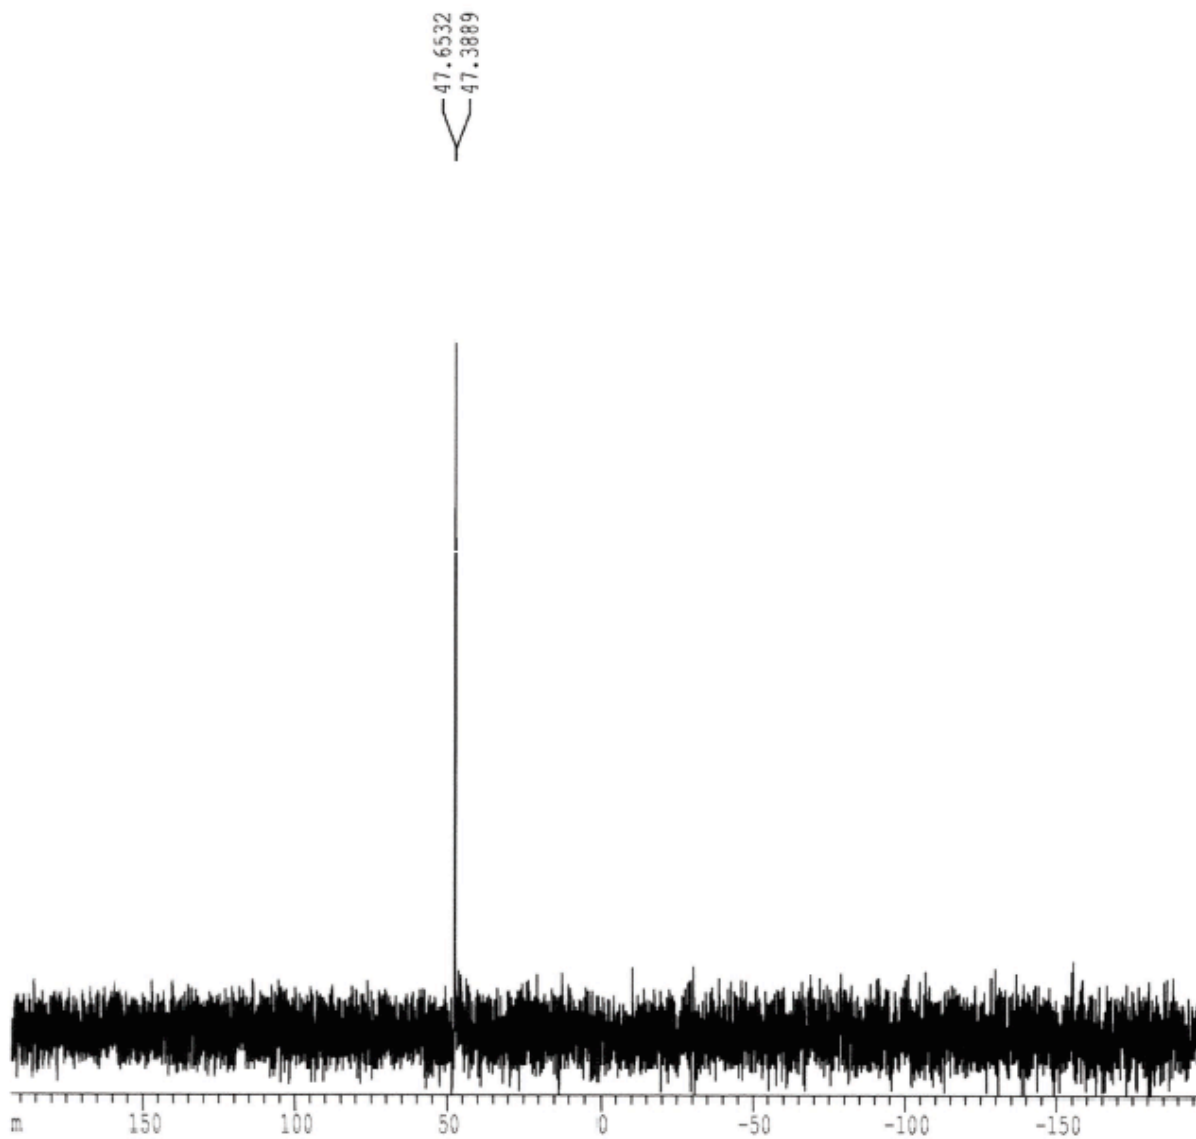

Figure S3

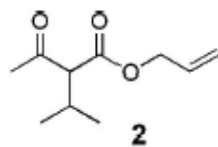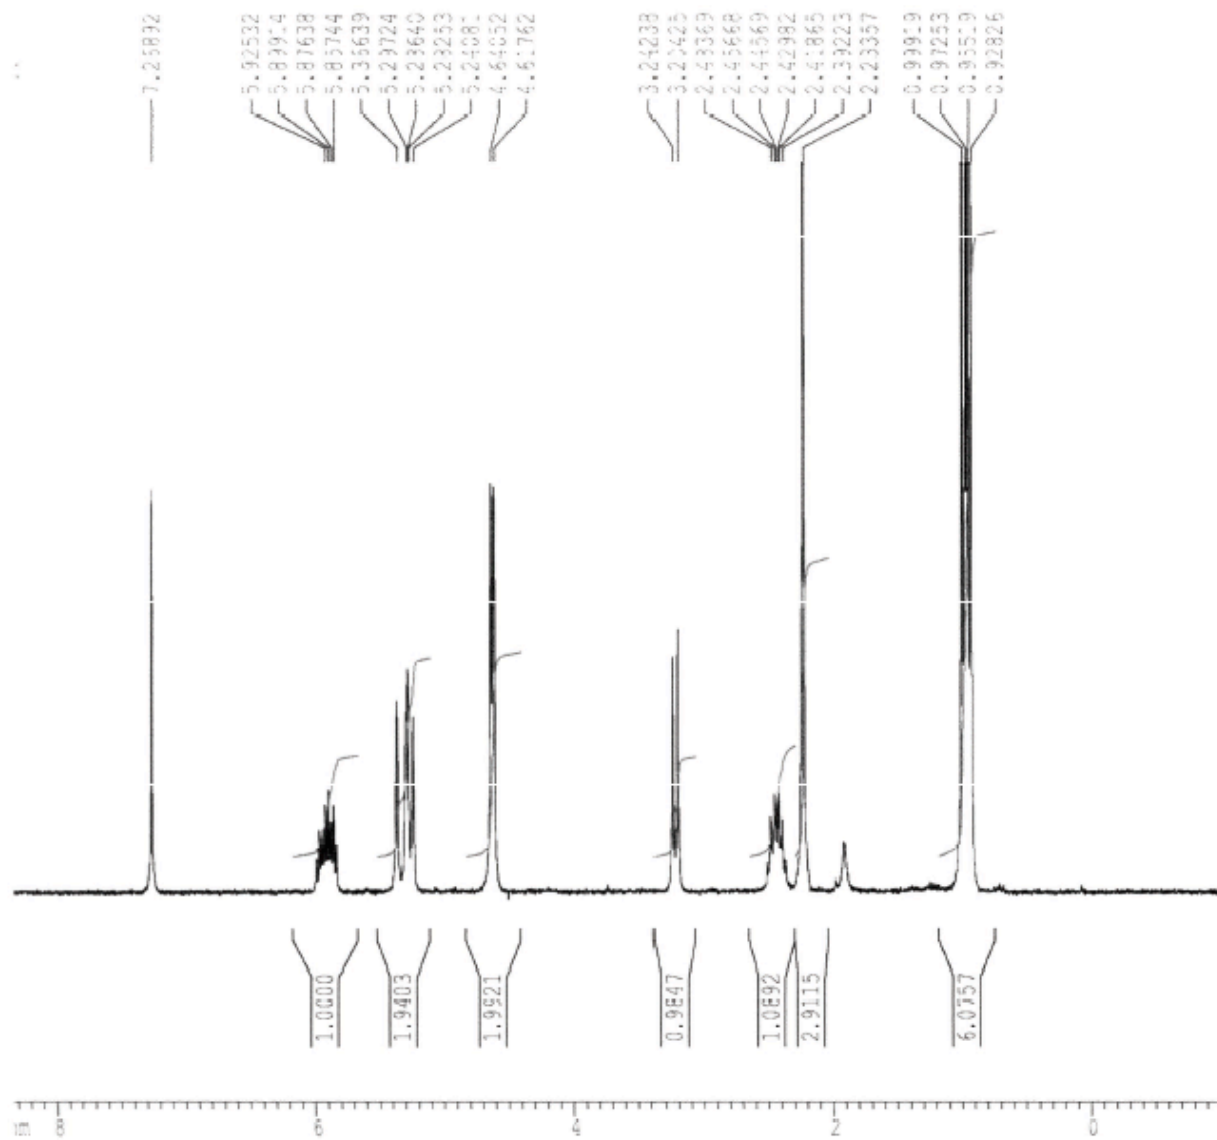

Figure S4

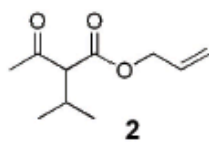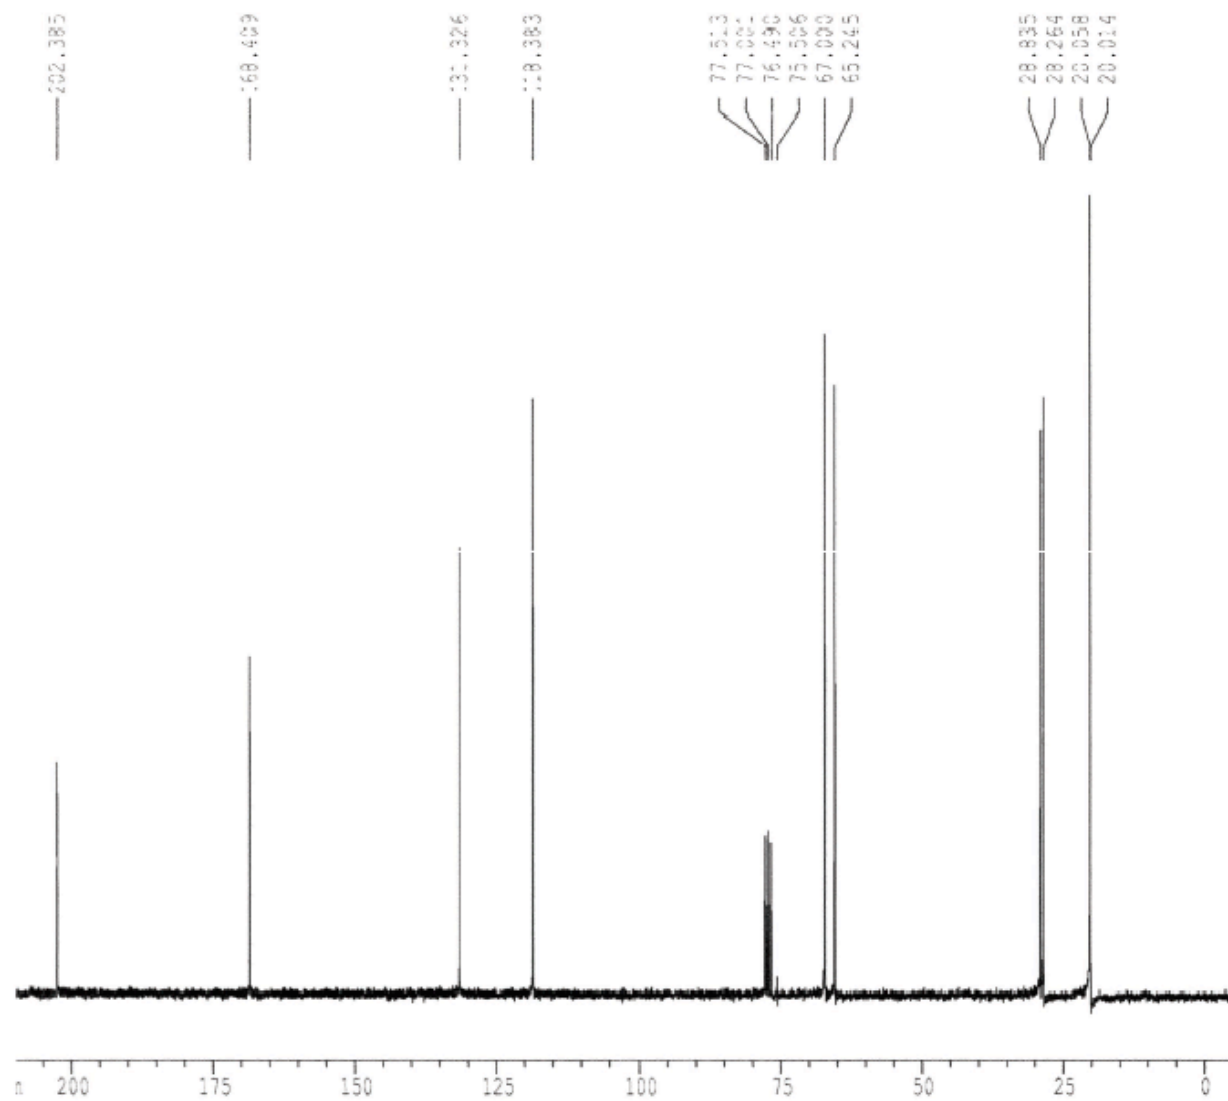

Figure S5



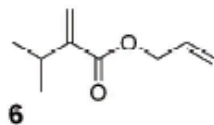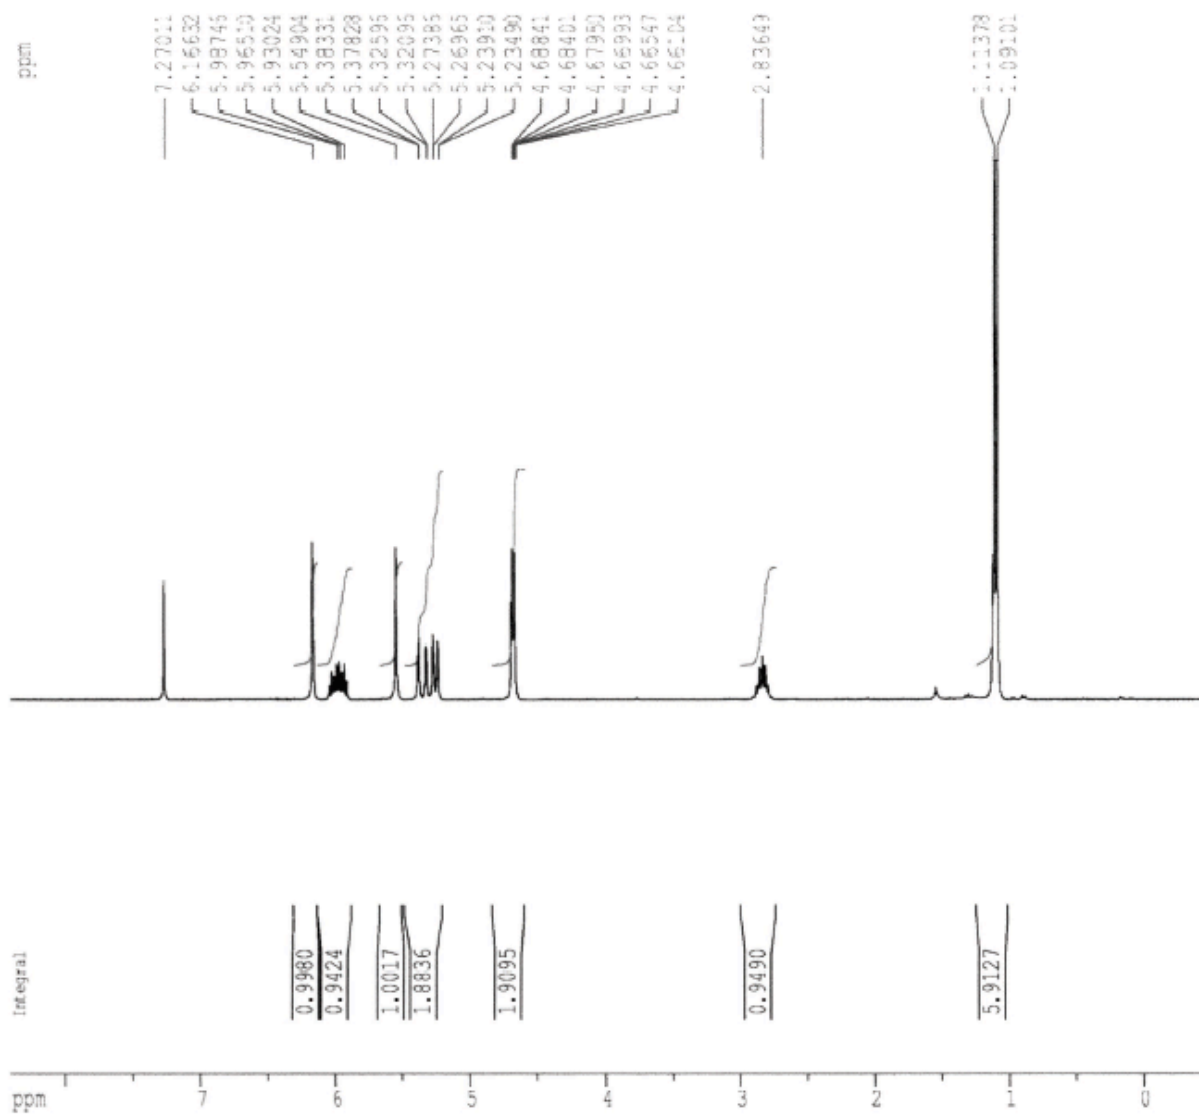

Figure S6

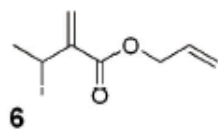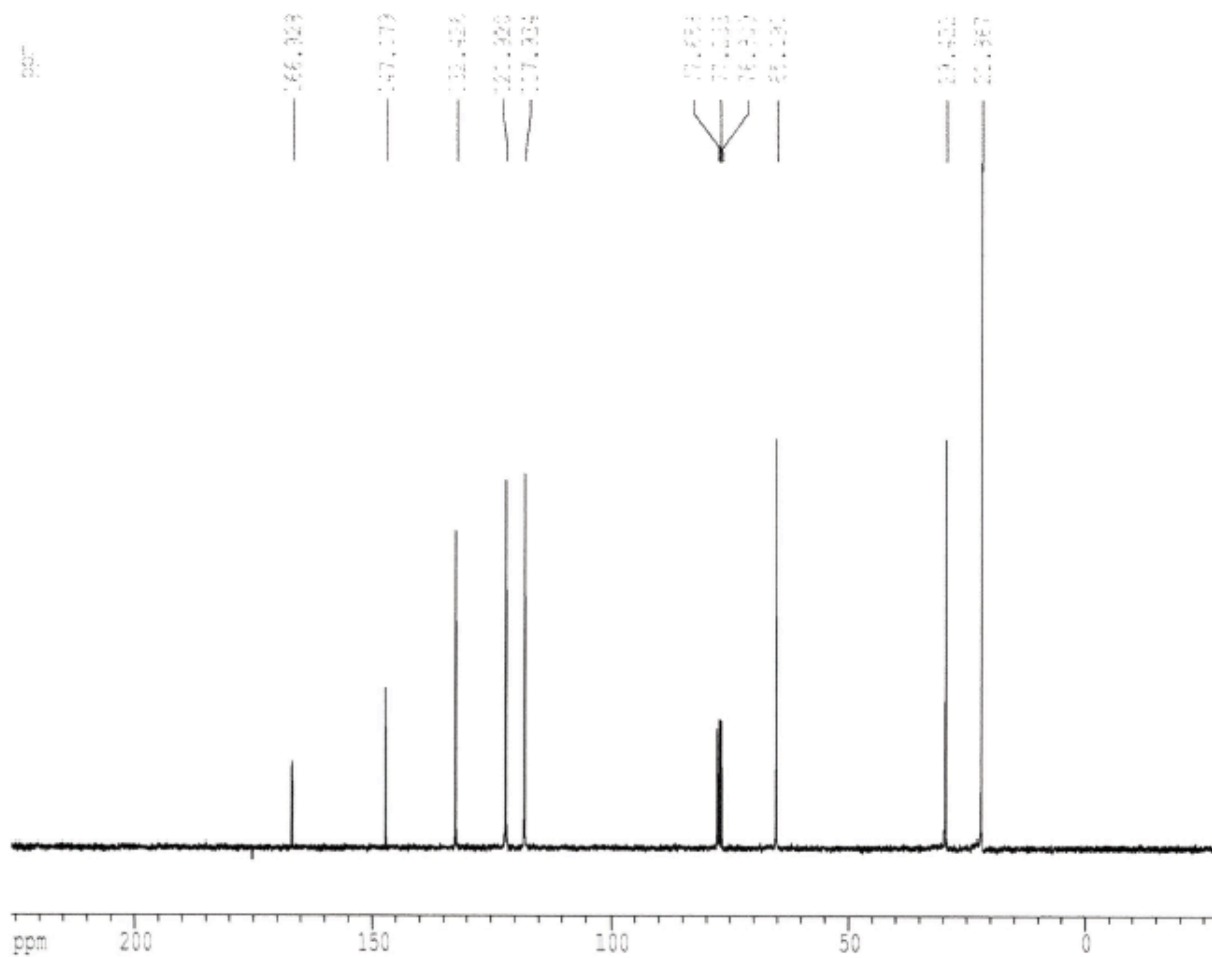

Figure S7

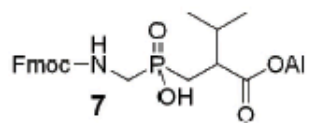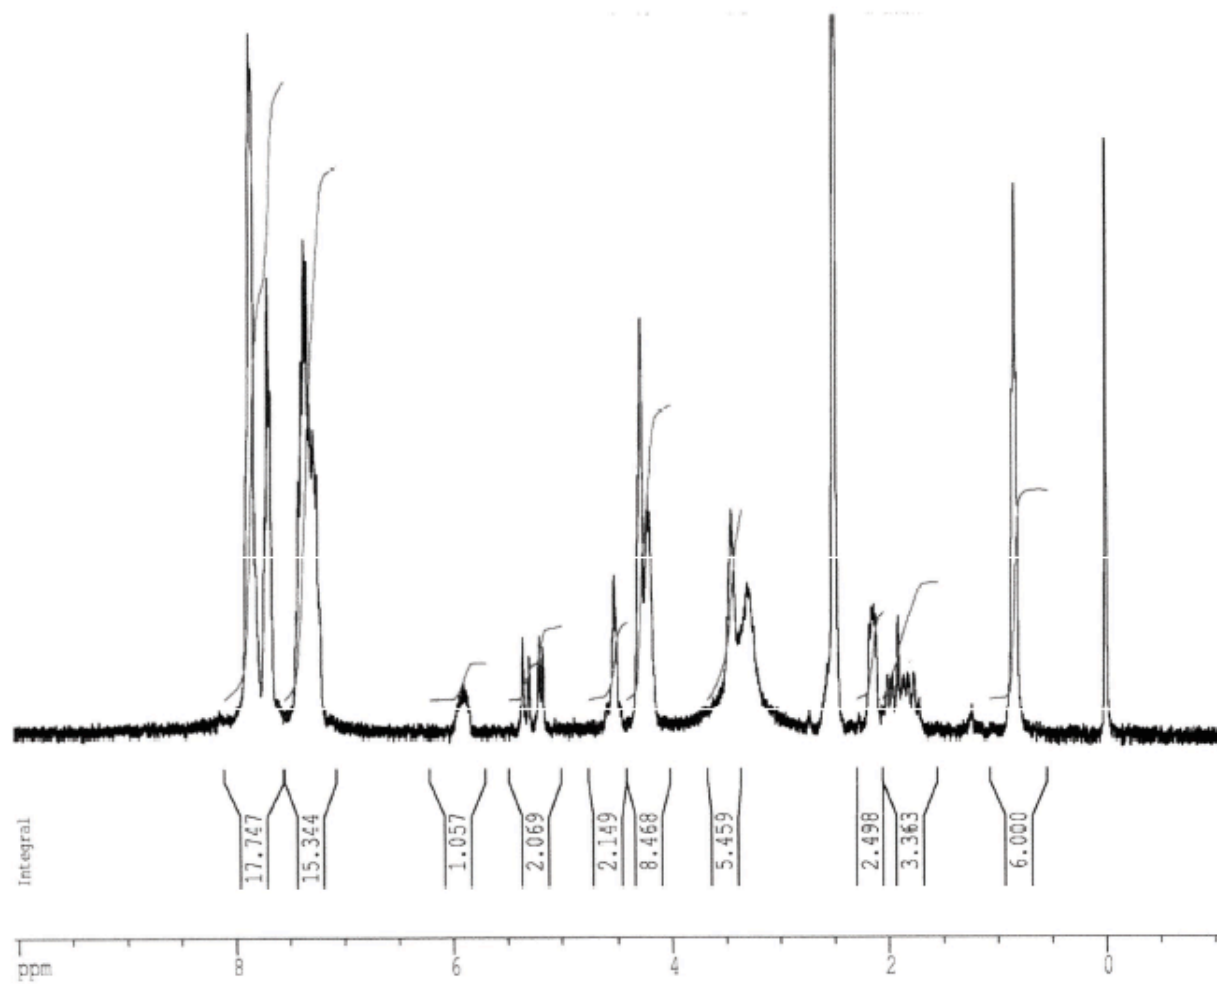

Figure S8

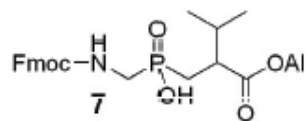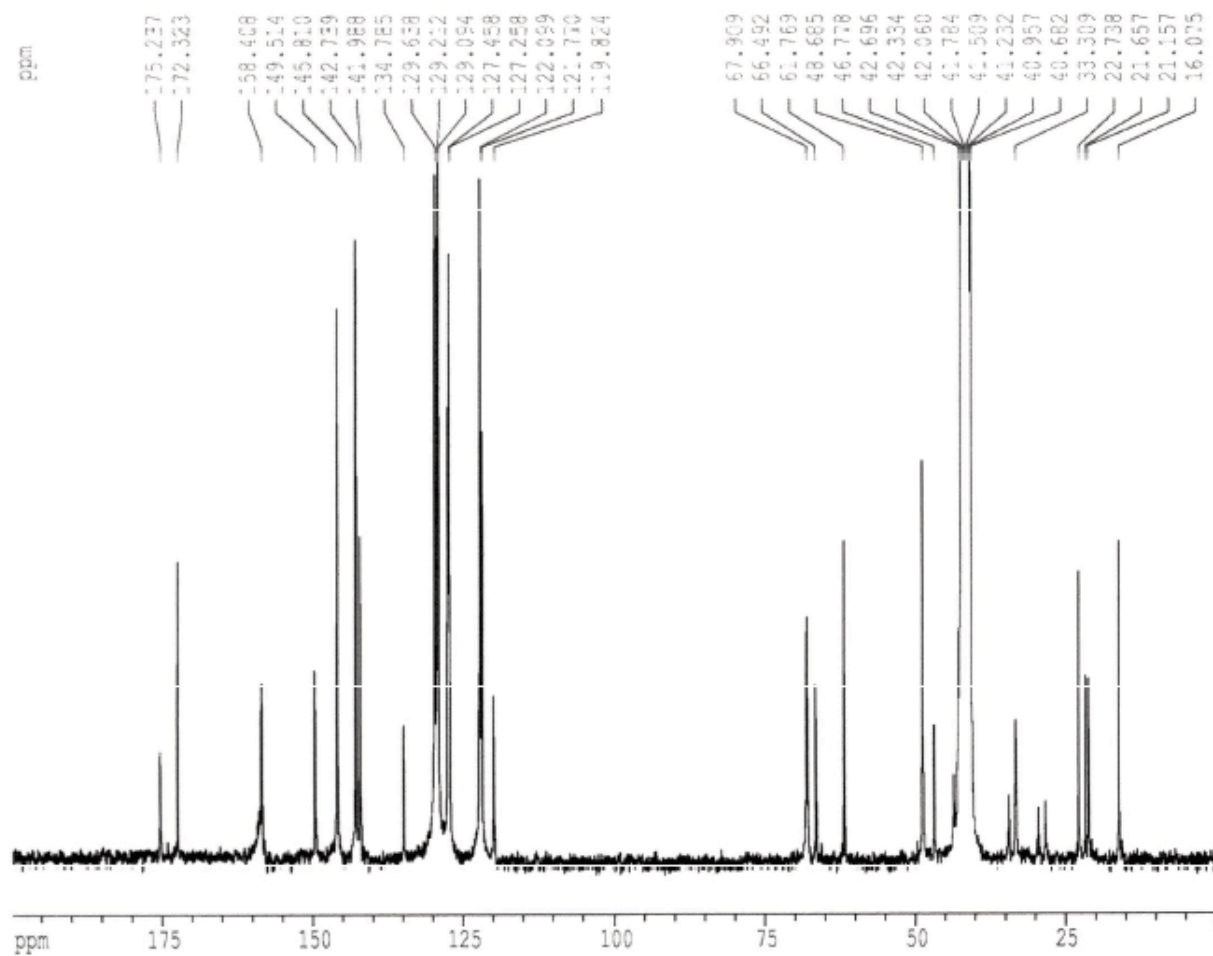

Figure S9

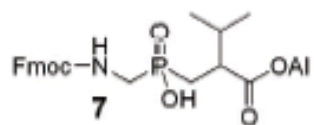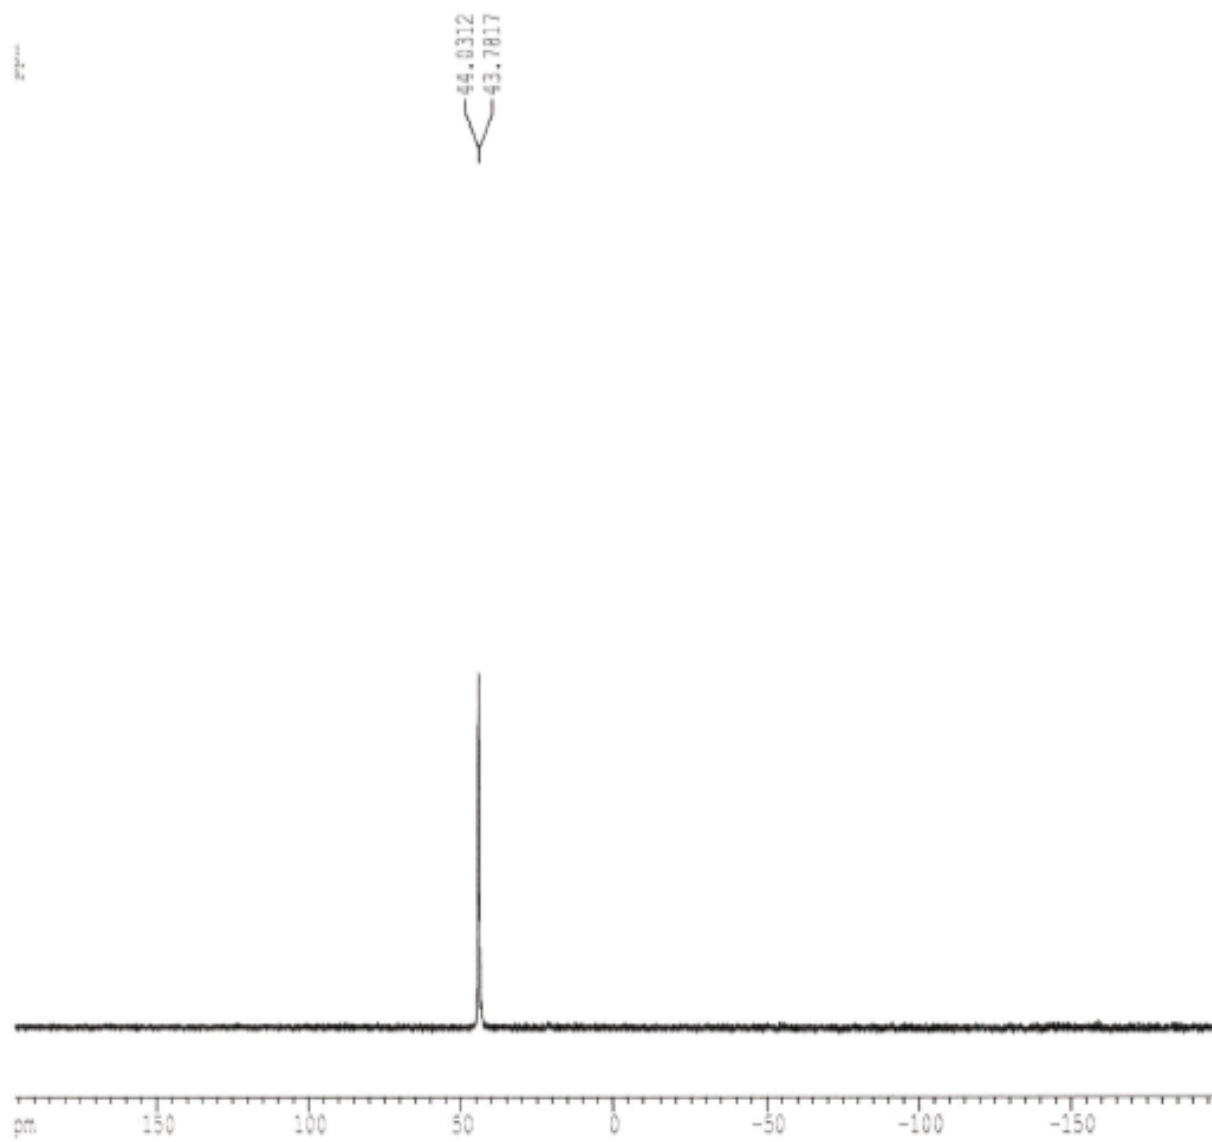

Figure S10

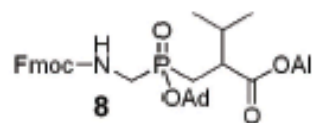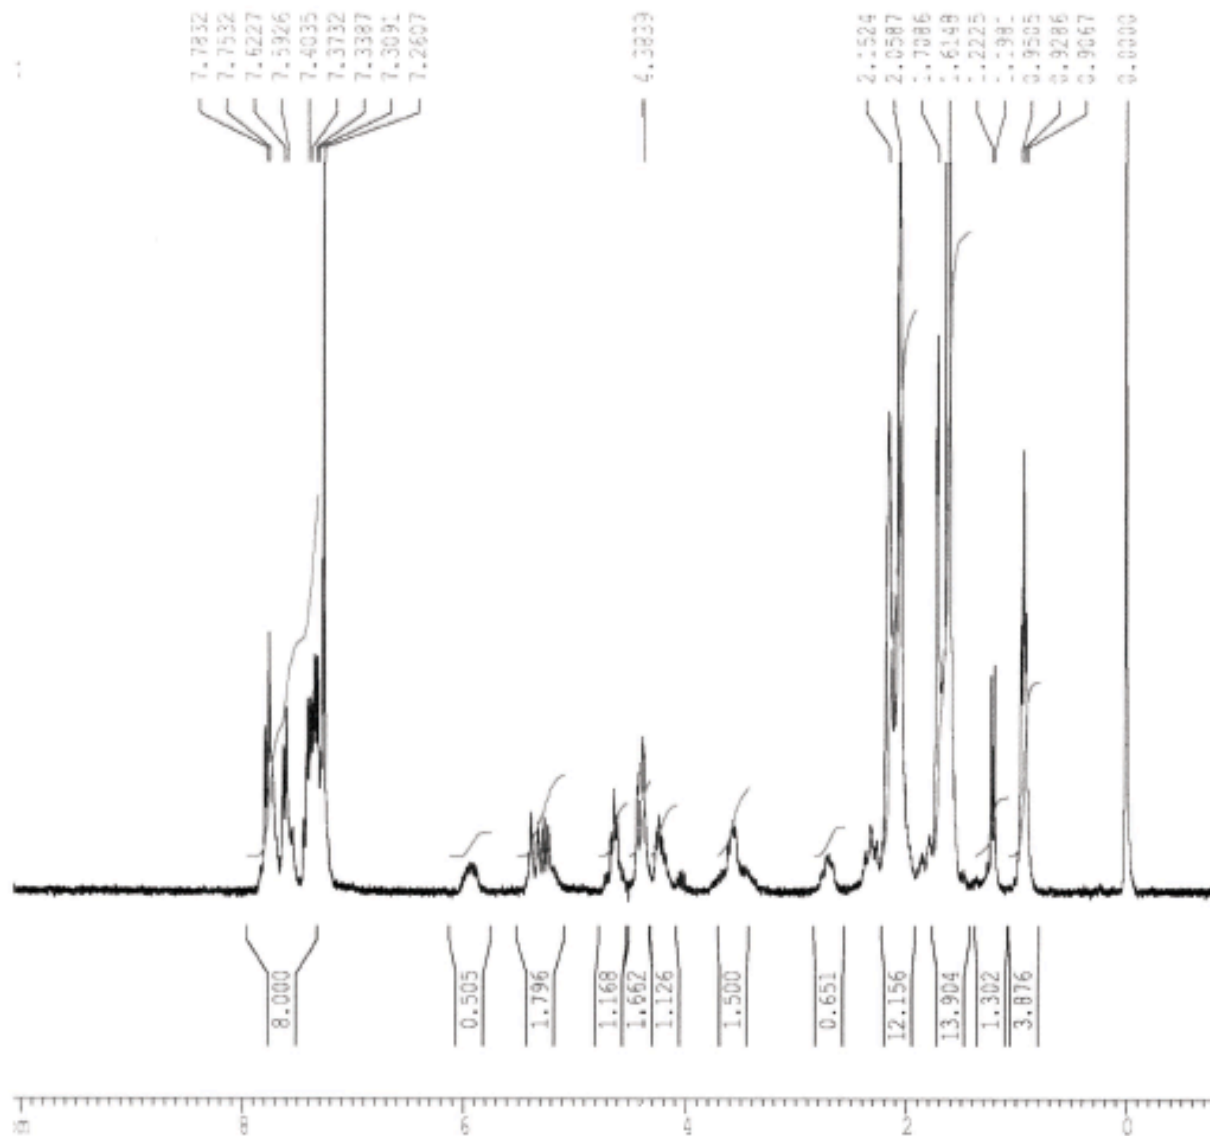

Figure S11

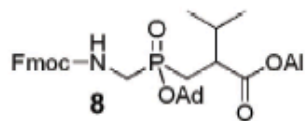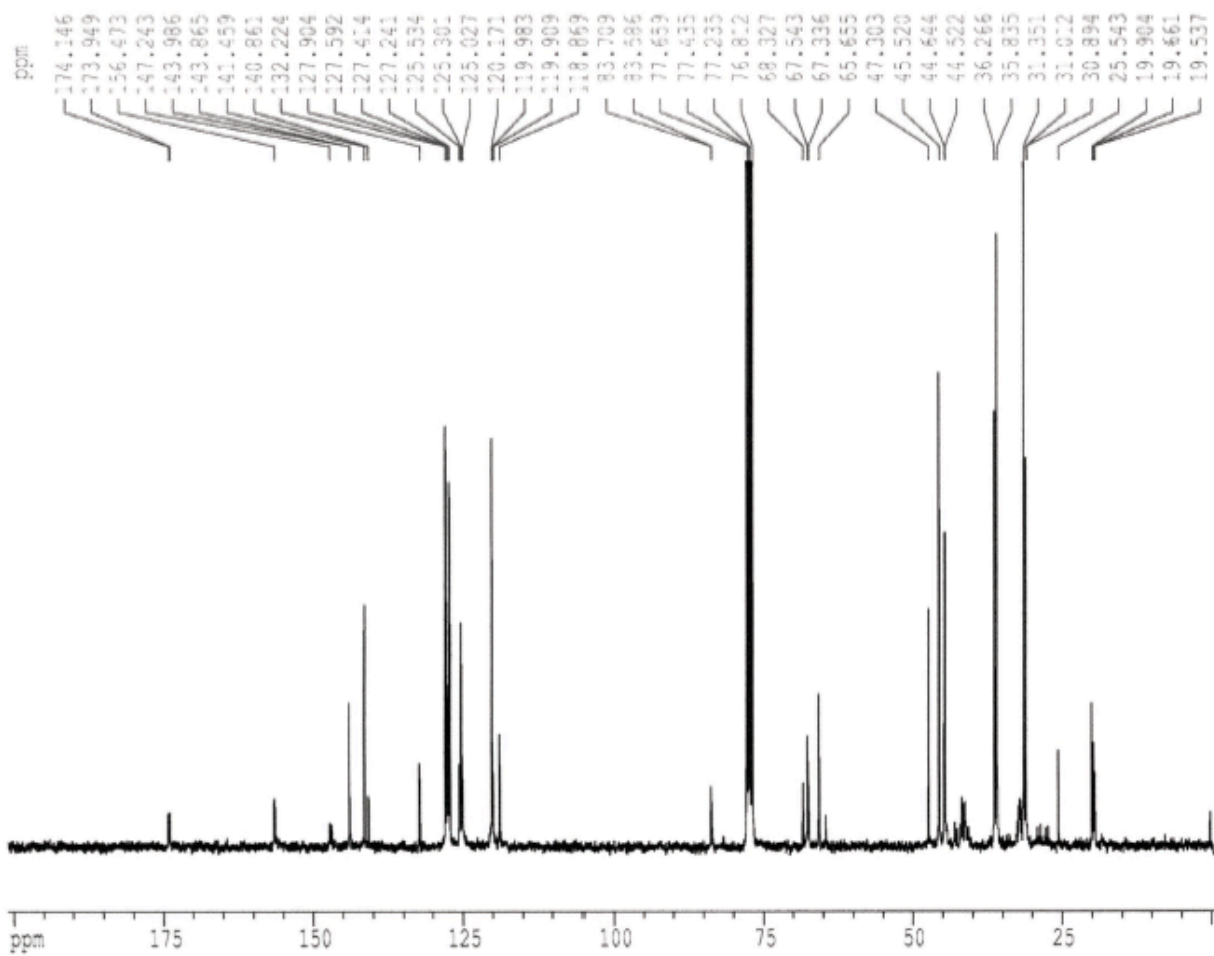

Figure S12

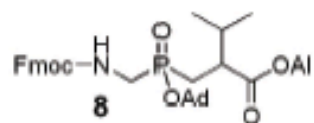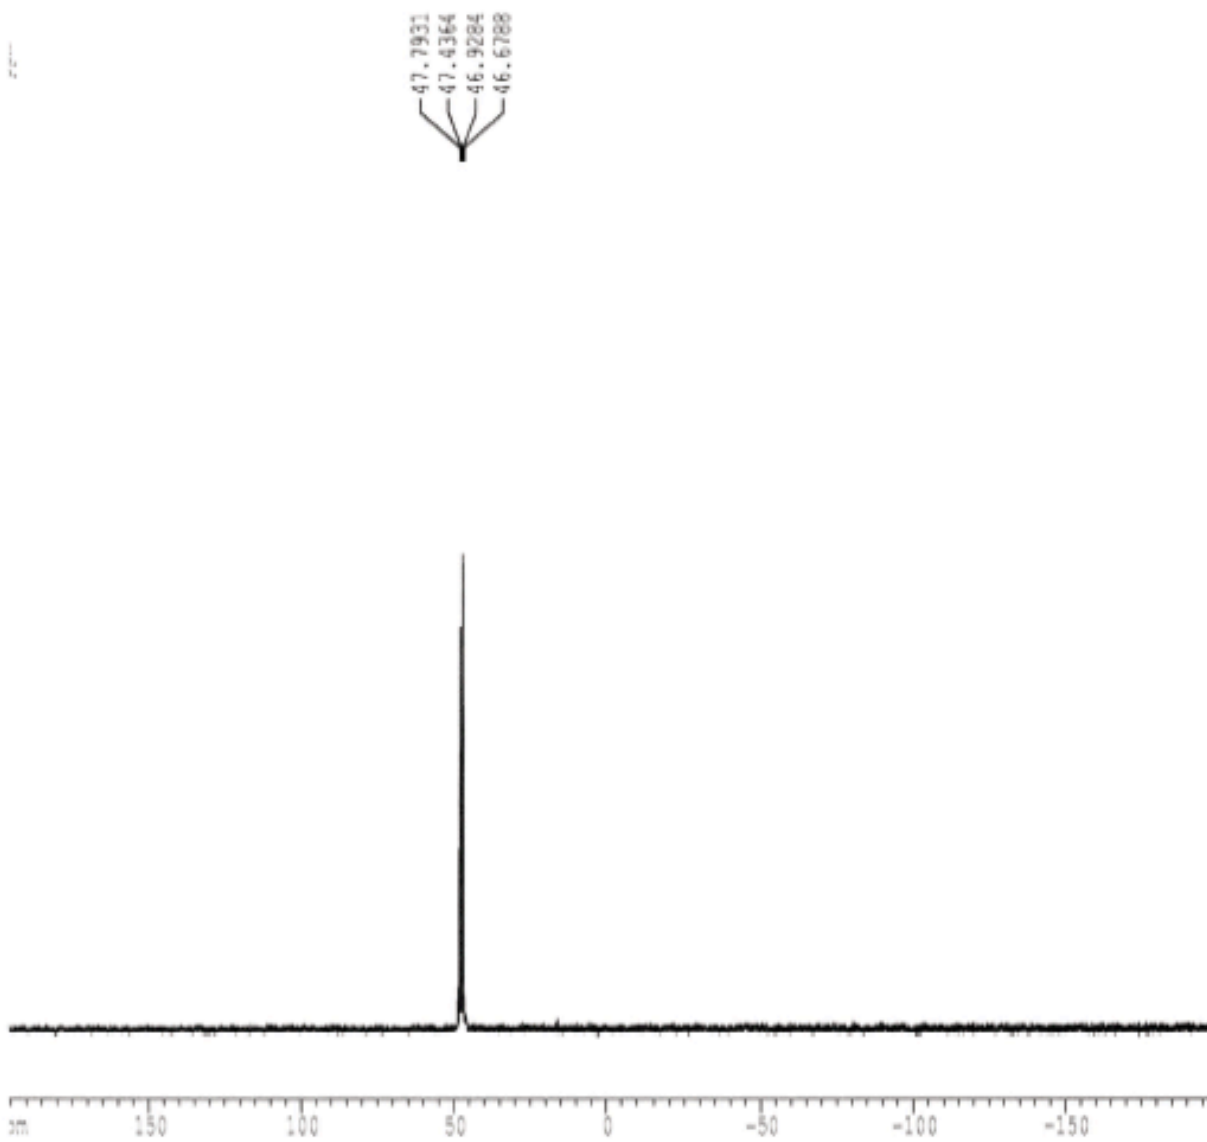

Figure S13
